# Supplementary material
Source: Springer Nature journal article supplement (https://www.springermedizin.de/resource/supplementary/13058_2012_3206_MOESM1_ESM.pdf/9703480)
Supplement: MOESM1 [file 9703480]

## All patients

49,312

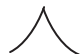

### Age at onset

≤74 y/o

≥75 y/o

39,987 (81.9%)

9,325 (18.9%)

### Protocol enrolled

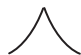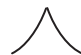

Yes

No<sup>1</sup>

Yes

No<sup>1,2</sup>

34,454 (86.2%)

5,533 (13.8%)

2,318 (24.9%)

7,007 (75.1%)

### On digoxin at enrollment

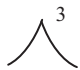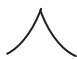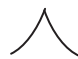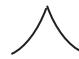

Yes

No

Yes

No

Yes

No

Yes

No

369 (1.1%)

34,085

113 (2.1%)

5,420

163 (7.0%)

2,182

809 (11.5%)

6,198
